# Supplementary material for: Phylogeny of Crataegus (Rosaceae) based on 257 nuclear loci and chloroplast genomes: evaluating the impact of hybridization
Source: PeerJ journal article supplement (doi:10.7717/peerj.12418), 2021-10-26
Supplement: peerj-56540-PeerJ_Supplemental_Figure_S1_renumbered_TADultimate.pdf [file peerj-56540-PeerJ_Supplemental_Figure_S1_renumbered_TADultimate.pdf]

**Dtree179**

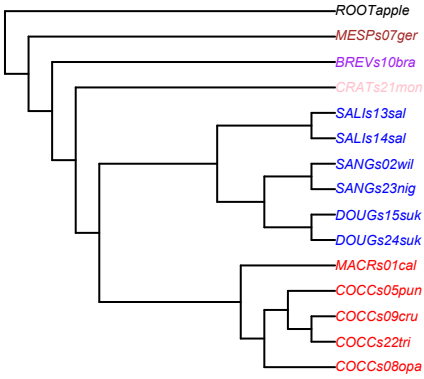

concordance = 0.75

**Tree179**

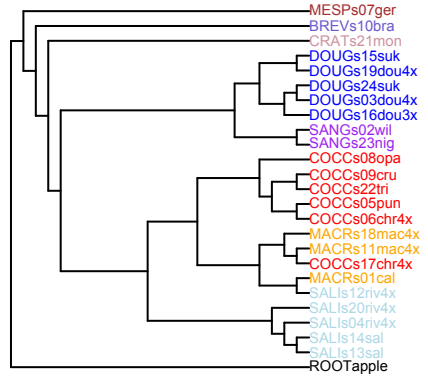

concordance = 0.418

**Dtree5**

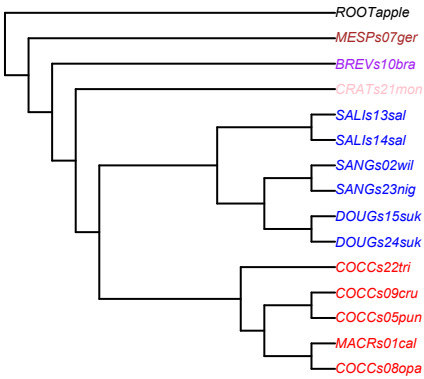

concordance = 0.719

**Tree5**

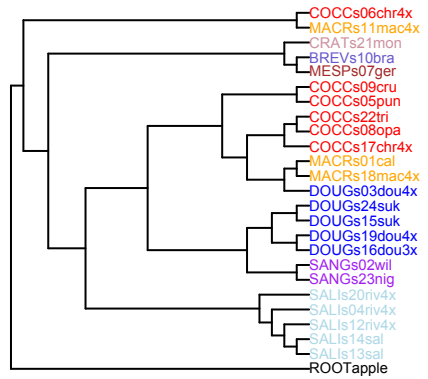

concordance = 0.349

**Dtree254**

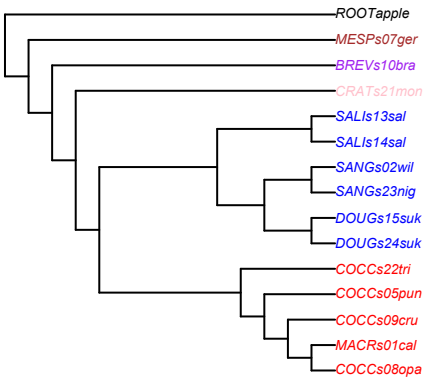

concordance = 0.719

**Tree254**

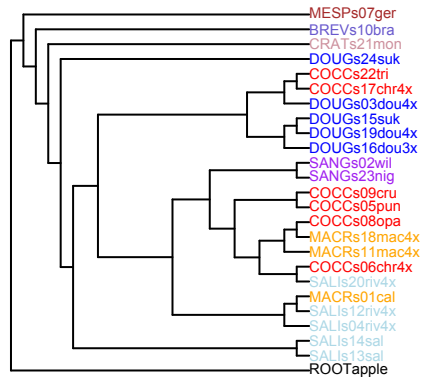

concordance = 0.287

**Dtree198**

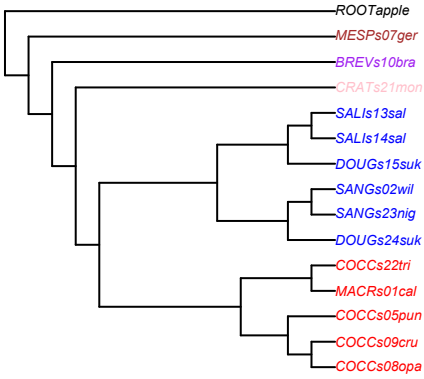

concordance = 0.698

**Tree198**

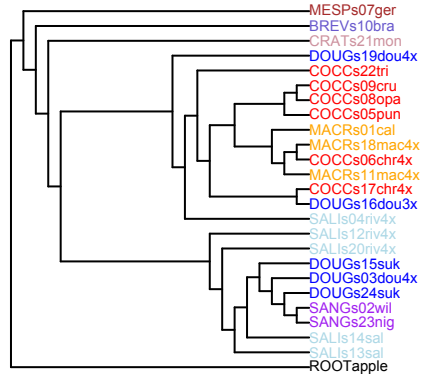

concordance = 0.51

**Dtree233**

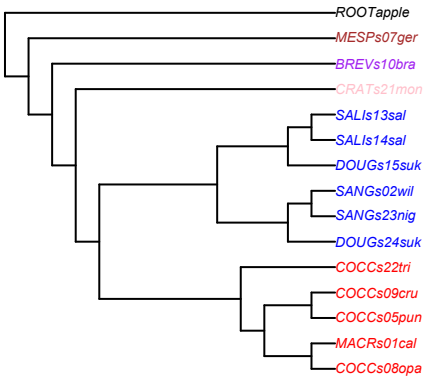

concordance = 0.677

**Tree233**

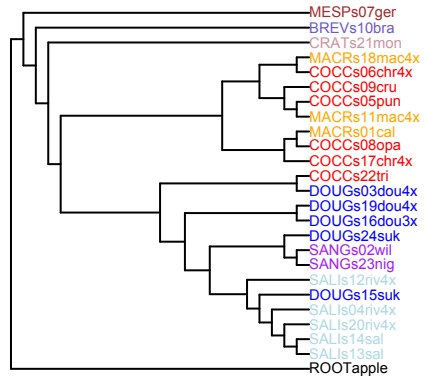

concordance = 0.605

**Dtree17**

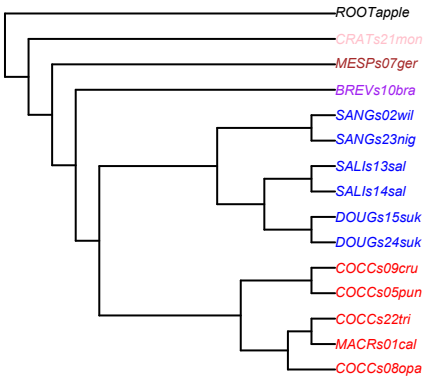

concordance = 0.667

**Tree17**

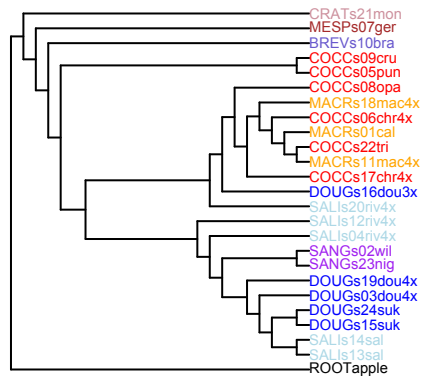

concordance = 0.314

**Dtree121**

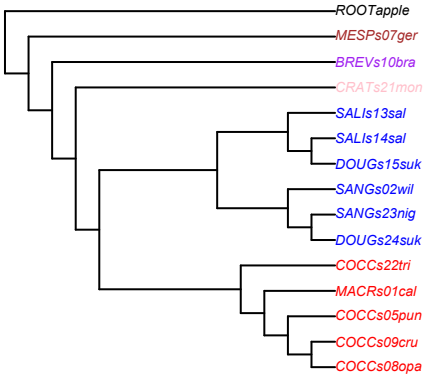

concordance = 0.667

**Tree121**

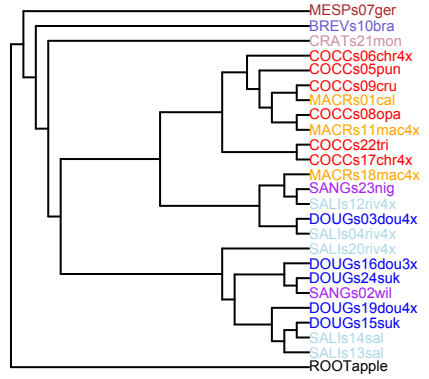

concordance = 0.506

**Dtree127**

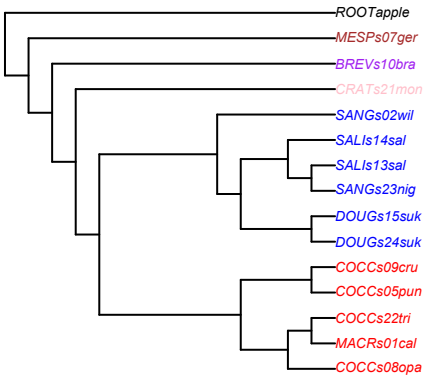

concordance = 0.646

**Tree127**

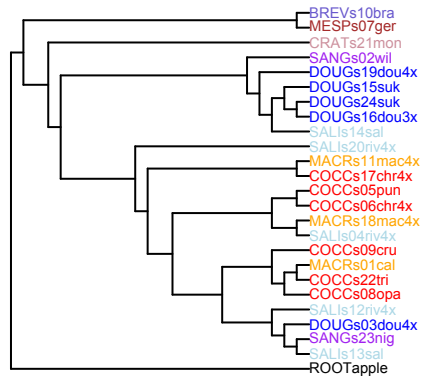

concordance = 0.169

**Dtree63**

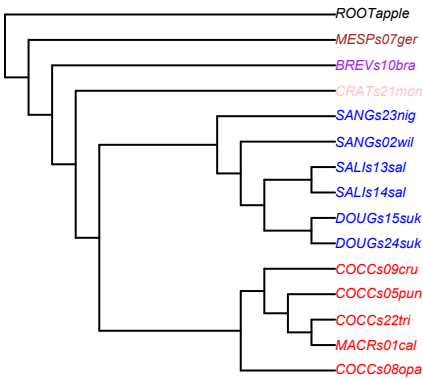

concordance = 0.635

**Tree63**

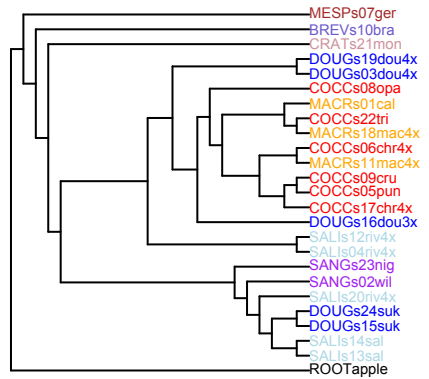

concordance = 0.46

**Dtree90**

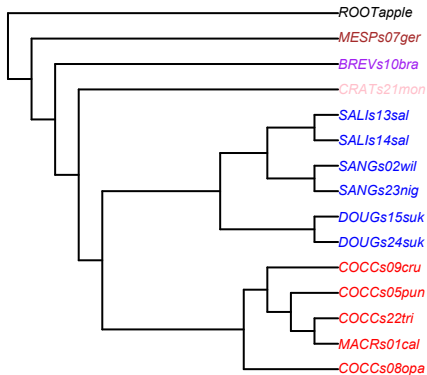

concordance = 0.635

**Tree90**

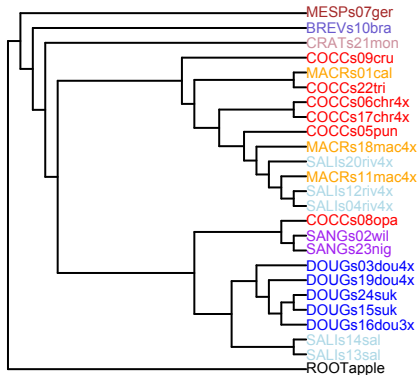

concordance = 0.49

**Dtree95**

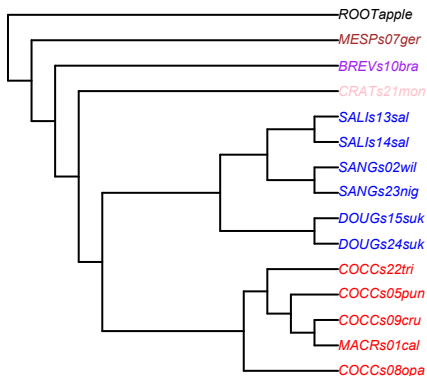

concordance = 0.635

**Tree95**

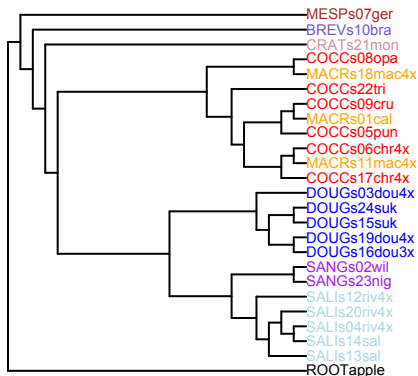

concordance = 0.713

**Dtree129**

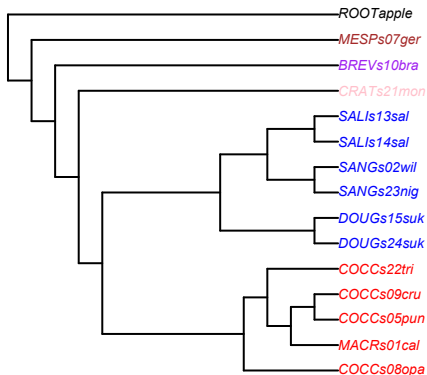

concordance = 0.635

**Tree129**

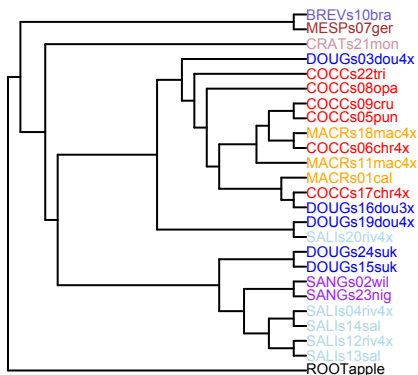

concordance = 0.207

**Dtree232**

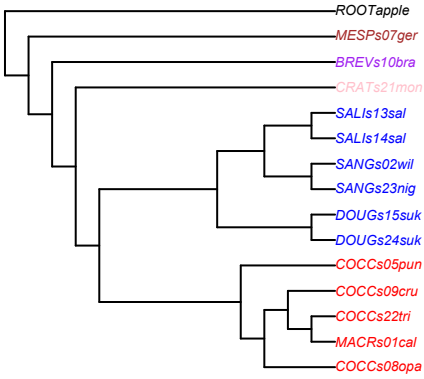

concordance = 0.635

**Tree232**

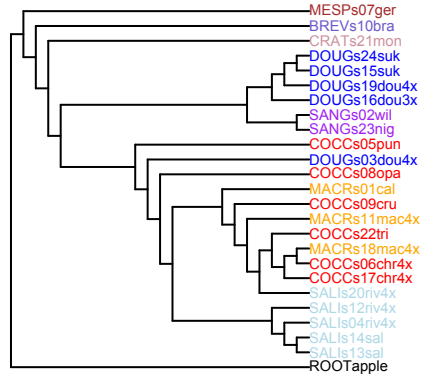

concordance = 0.395

**Dtree237**

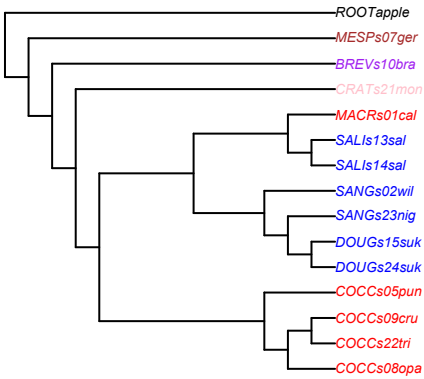

concordance = 0.625

**Tree237**

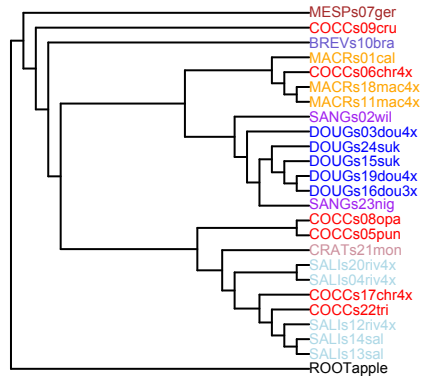

concordance = 0.303

**Dtree22**

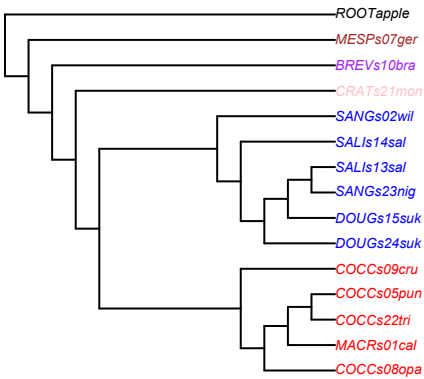

concordance = 0.615

**Tree22**

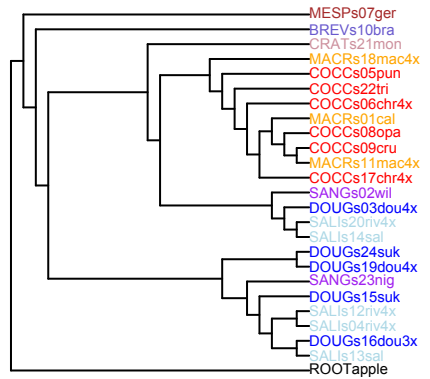

concordance = 0.192

**Dtree58**

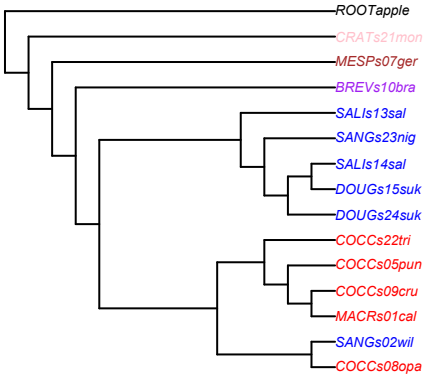

concordance = 0.615

**Tree58**

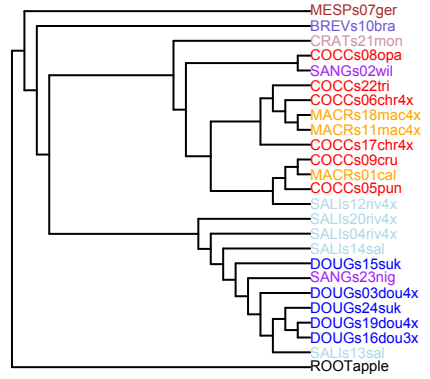

concordance = 0.215

**Dtree222**

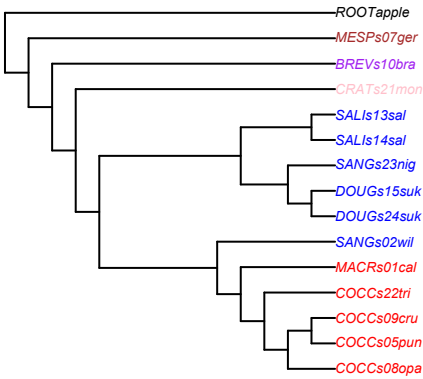

concordance = 0.615

**Tree222**

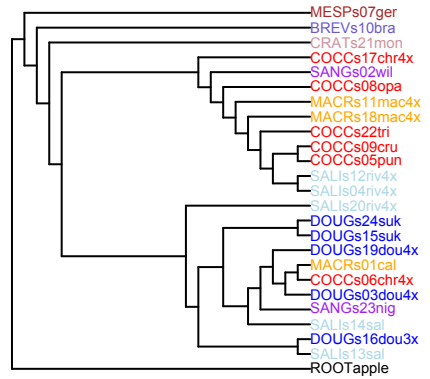

concordance = 0.475

**Dtree91**

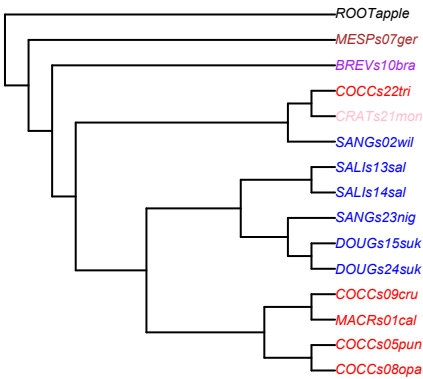

concordance = 0.594

**Tree91**

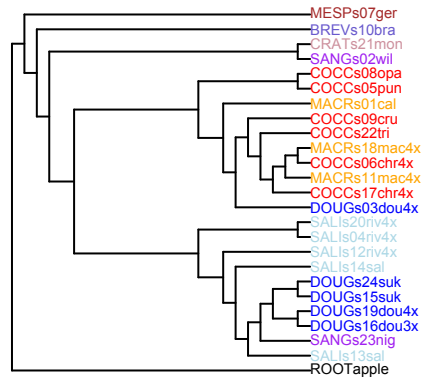

concordance = 0.582

### Dtree208

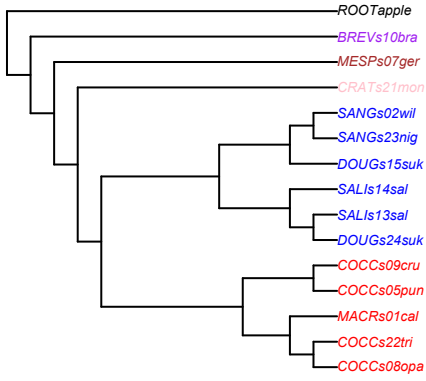

concordance = 0.573

### Tree208

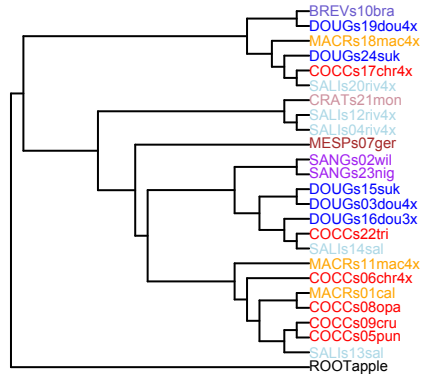

concordance = 0.352
