# Supplementary material for: Phylogeny of Crataegus (Rosaceae) based on 257 nuclear loci and chloroplast genomes: evaluating the impact of hybridization
Source: PeerJ journal article supplement (doi:10.7717/peerj.12418), 2021-10-26
Supplement: peerj-56540-PeerJ_Supplemental_Figure_S2_renumbered_TADultimate.pdf [file peerj-56540-PeerJ_Supplemental_Figure_S2_renumbered_TADultimate.pdf]

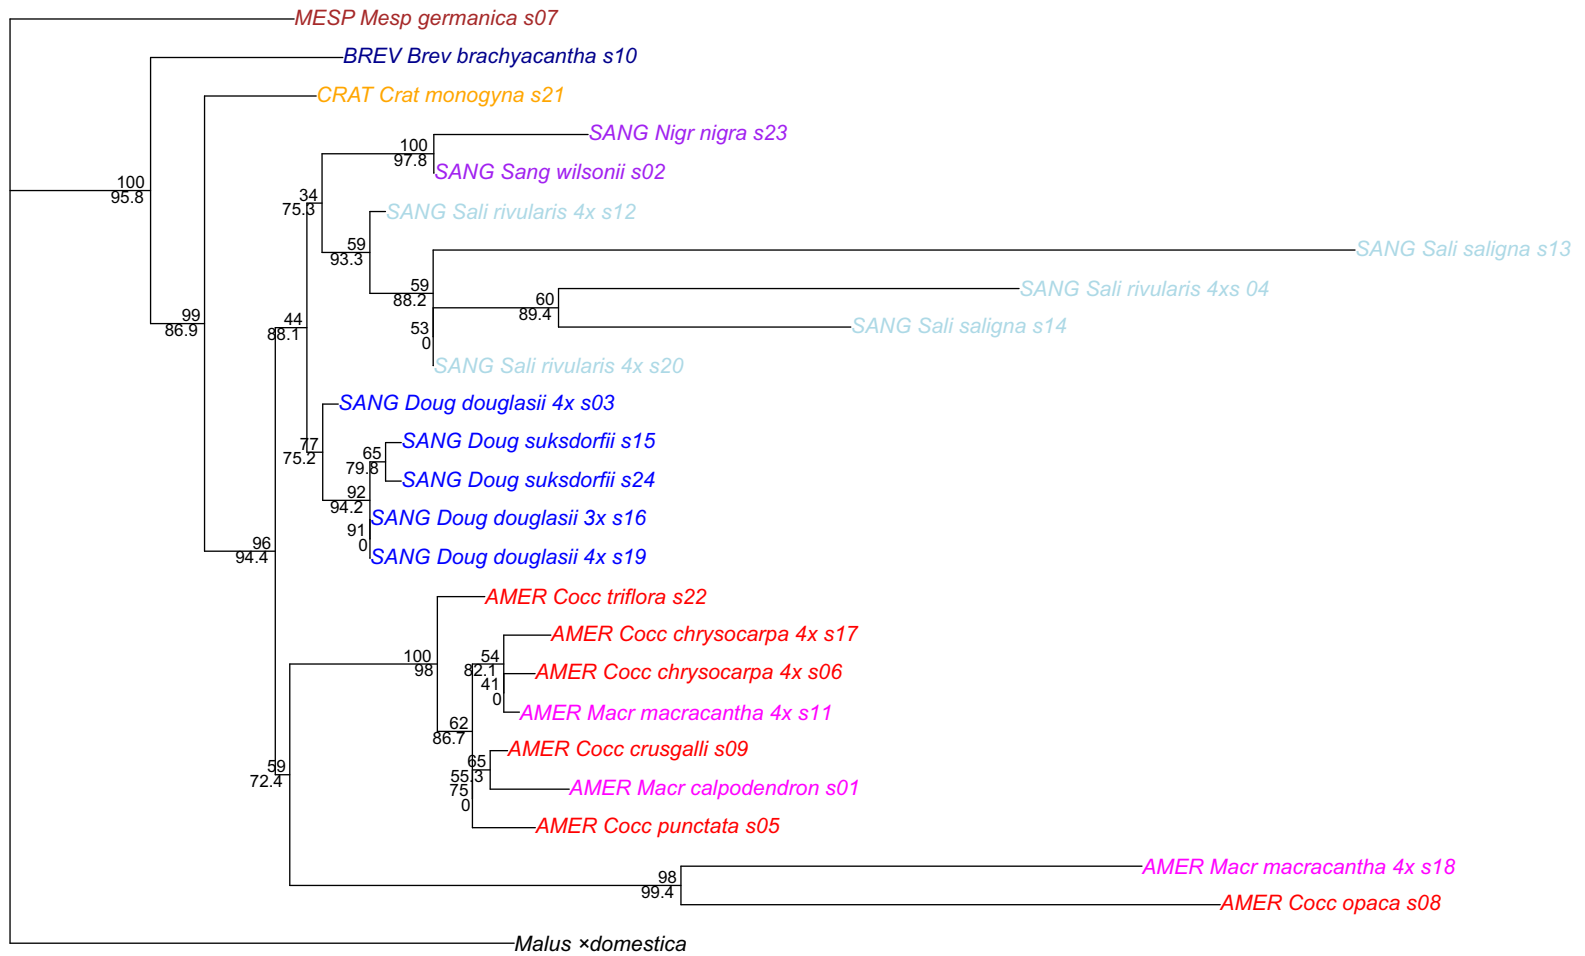

0.005
