# Supplementary material for: Phylogeny of Crataegus (Rosaceae) based on 257 nuclear loci and chloroplast genomes: evaluating the impact of hybridization
Source: PeerJ journal article supplement (doi:10.7717/peerj.12418), 2021-10-26

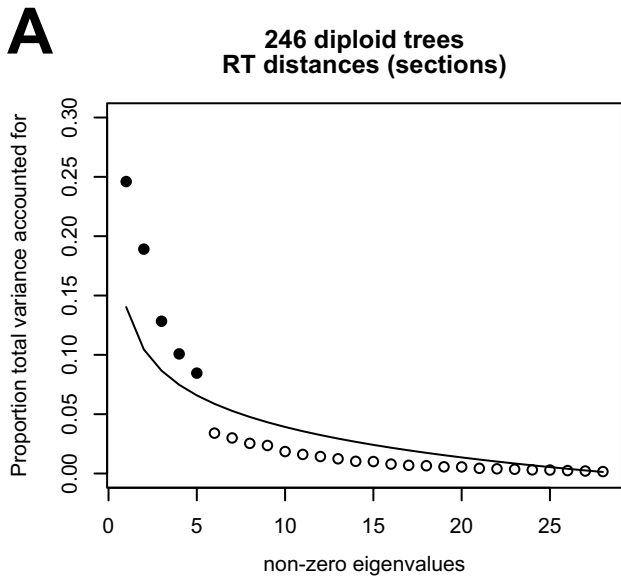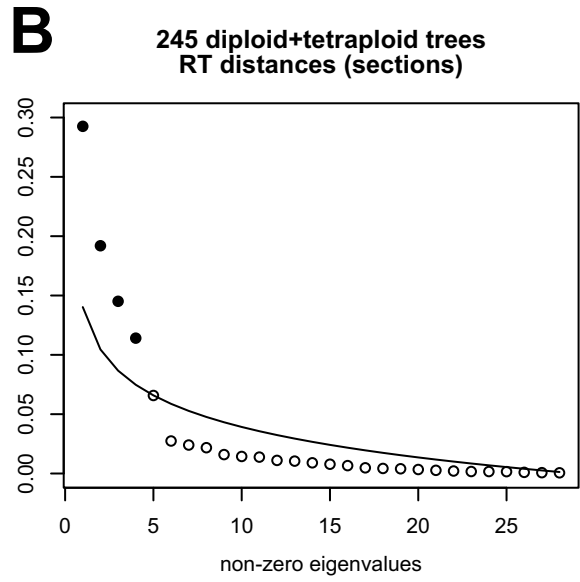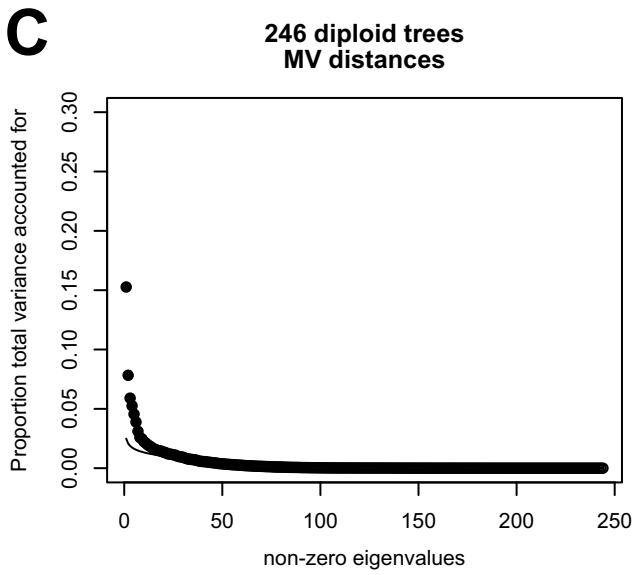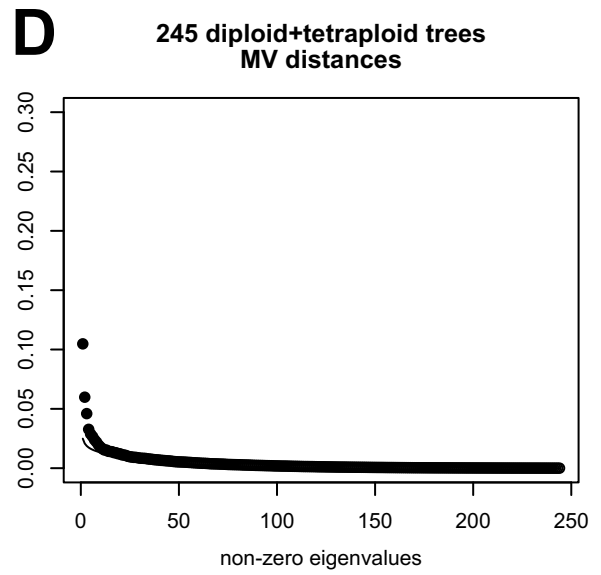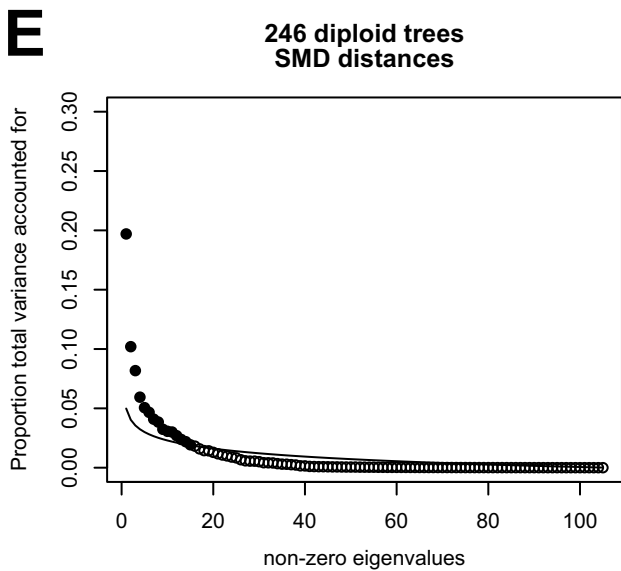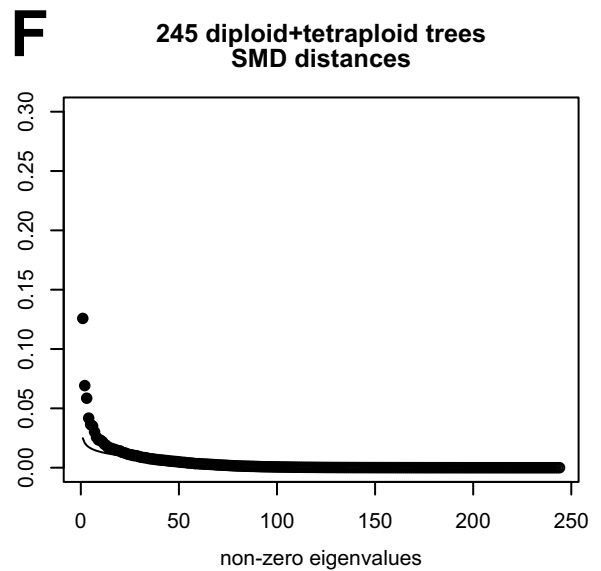

Supplement: PeerJ_Supplemental_Fig.S4ultimate.pdf [file PeerJ_Supplemental_Fig.S4ultimate.pdf]
