# Supplementary material for: Phylogeny of Crataegus (Rosaceae) based on 257 nuclear loci and chloroplast genomes: evaluating the impact of hybridization
Source: PeerJ journal article supplement (doi:10.7717/peerj.12418), 2021-10-26

**A** HyDe Test, *C. rivularis* as AMER × SANG hybrid  
500 bootstrap replicates

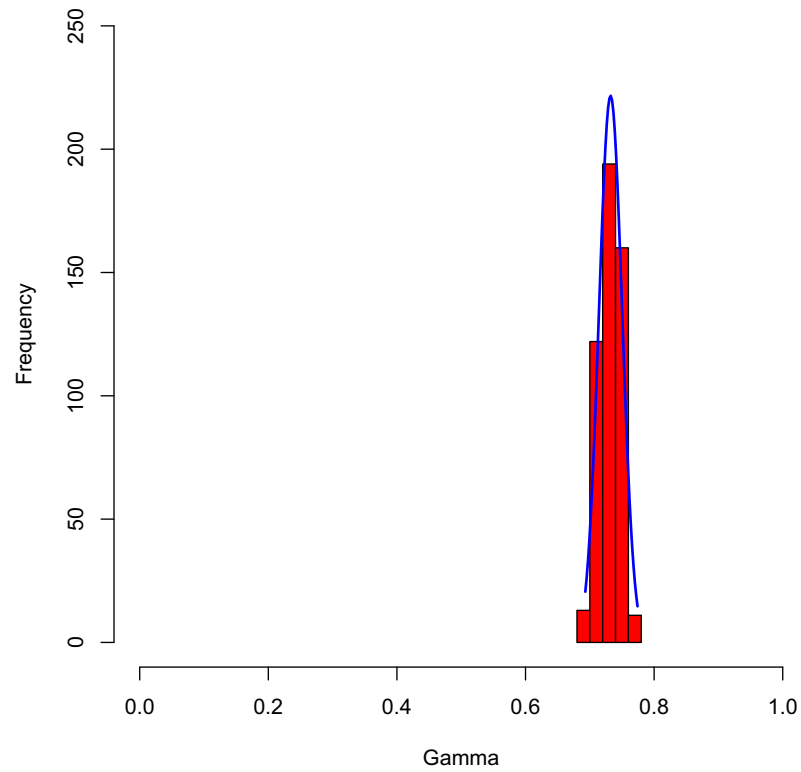

**B** HyDe Test, *C. douglasii* as AMER × SANG hybrid  
500 bootstrap replicates

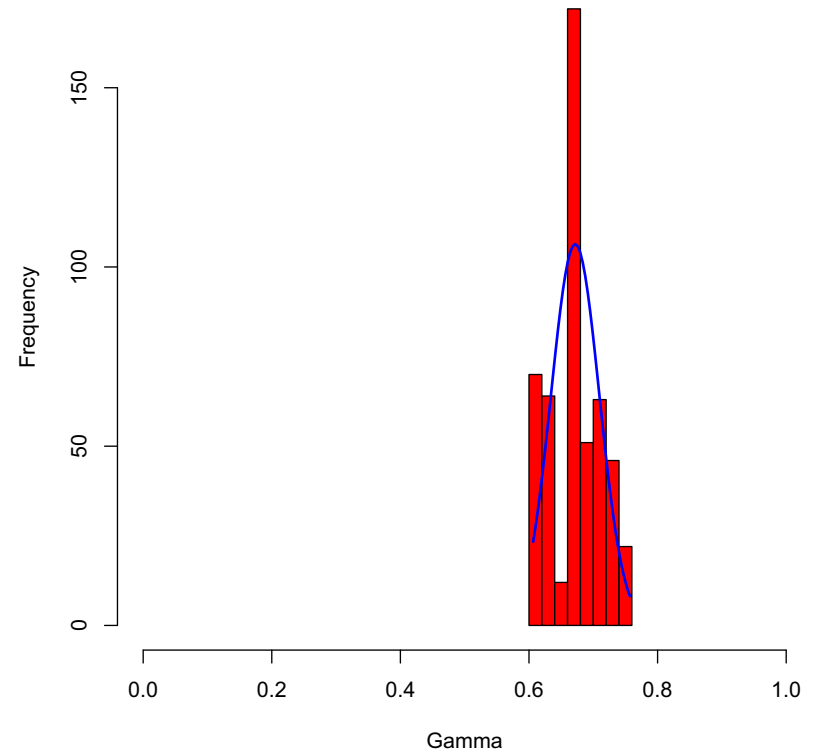

Supplement: PeerJ_Supplemental_Figure_S3_renumbered_TADultimate.pdf [file PeerJ_Supplemental_Figure_S3_renumbered_TADultimate.pdf]
